# Supplementary material for: Efficacy comparisons of enteral nutrition and parenteral nutrition in patients with severe acute pancreatitis: a meta-analysis from randomized controlled trials
Source: PubMed Central journal article supplement (PMC6239262; doi:10.1042/bsr20181515), 2018-11-16

|                    | Random sequence generation (selection bias) | Allocation concealment (selection bias) | Blinding of participants and personnel (performance bias) | Blinding of outcome assessment (detection bias) | Incomplete outcome data (attrition bias) | Selective reporting (reporting bias) | Other bias |
|--------------------|---------------------------------------------|-----------------------------------------|-----------------------------------------------------------|-------------------------------------------------|------------------------------------------|--------------------------------------|------------|
| Casas 2007         | +                                           | +                                       | ?                                                         | ?                                               | +                                        | +                                    | +          |
| Doley 2009         | +                                           | +                                       | -                                                         | ?                                               | +                                        | +                                    | +          |
| Gao 2013           | +                                           | ?                                       | ?                                                         | +                                               | +                                        | +                                    | +          |
| KalFarentzos 21997 | +                                           | +                                       | -                                                         | ?                                               | +                                        | +                                    | +          |
| Louie 2006         | +                                           | +                                       | ?                                                         | -                                               | +                                        | +                                    | +          |
| Petrov 2006        | +                                           | ?                                       | ?                                                         | ?                                               | +                                        | +                                    | +          |
| Shi 2014           | +                                           | ?                                       | -                                                         | ?                                               | +                                        | +                                    | +          |
| Tan 2014           | +                                           | ?                                       | ?                                                         | ?                                               | +                                        | +                                    | +          |
| Yin 2012           | +                                           | +                                       | ?                                                         | ?                                               | +                                        | +                                    | +          |
| Zhang 2015         | +                                           | +                                       | ?                                                         | -                                               | +                                        | +                                    | +          |
| Zhang 2016         | +                                           | +                                       | ?                                                         | -                                               | +                                        | +                                    | +          |

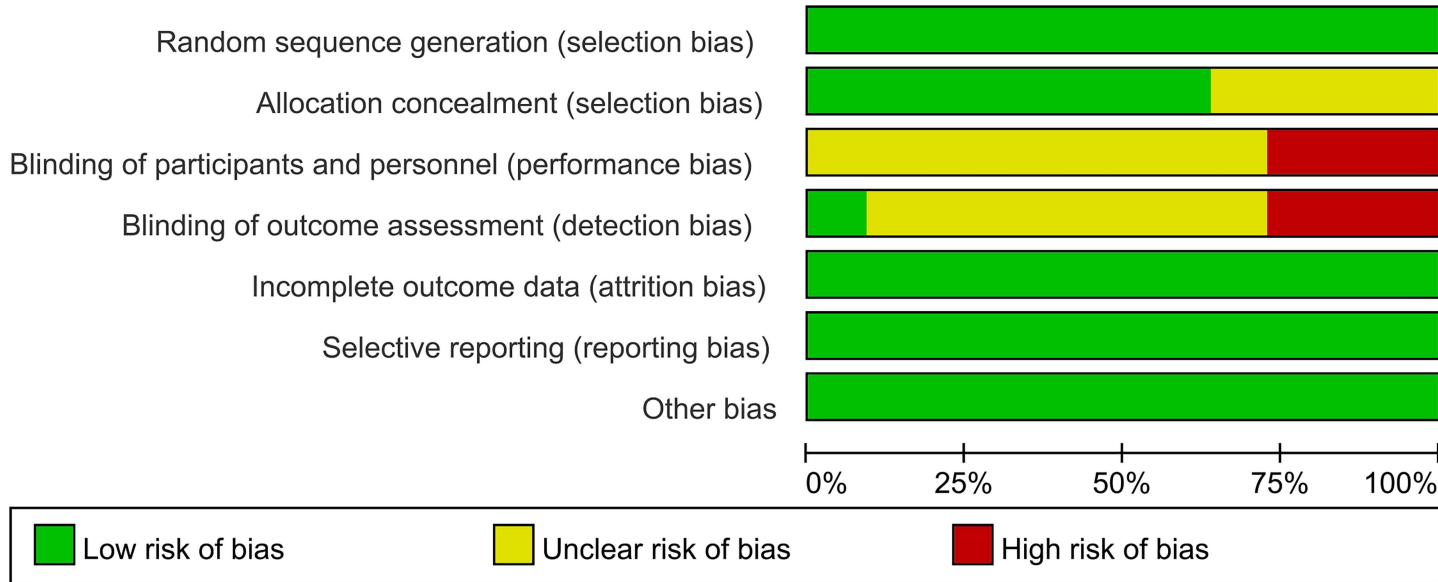

Supplement: bsr20181515_Supp1.pdf [file bsr20181515_Supp1.pdf]
